# Supplementary material for: How accurate are continuum solvation models for drug-like molecules?
Source: Springer Nature journal article supplement (doi:10.1007/s10822-009-9271-6), 2009-05-14

**Supplementary material for**

**How accurate are continuum solvation models for drug-like molecules?**

**by Jacob Kongsted, Pär Söderhjelm, & Ulf Ryde**

**References** (with the same numbering as in the main paper):

19. Sitkoff, D.; Sharp, K. A.; Honig, B. J. *Phys. Chem.* 1994, 98, 1978-1988.
35. Marenich, A. V.; Olson, R. M.; Kelly, C. P.; Cramer, C. J.; Truhlar, D. G. *J. Chem. Theory Comput.* 2007, 3, 2011-2033.
37. Florián, J. Warshel, A. *J. Phys. Chem. B* 1997, 101, 5583.
56. Wolfenden, R.; Andersson, L.; Cullis, P. M.; Southgate, C. C. B. *Biochemistry* 1981, 20, 849-855.
57. Kelly, C. P.; Cramer, C. J.; Truhlar, D. G. *J. Phys. Chem. B* 2006, 110, 16066-16081.
90. Rydberg, P.; Hansen, S. M.; Kongsted, J.; Norrby, P.-O.; Olsen, L.; Ryde, U.; *J. Chem. Theor. Comput.*, 2008,4 , 673-681.

**Table S1.** Molecules in the calibration set, together with experimental free energies of solvation ( $\Delta G_{\text{solv}}$ , in kJ/mol).

| Molecules                                                                 | $\Delta G_{\text{solv}}$ | Reference       |
|---------------------------------------------------------------------------|--------------------------|-----------------|
| water, H <sub>2</sub> O                                                   | -26.40                   | 35              |
| methanol, CH <sub>3</sub> OH                                              | -21.38                   | 35              |
| ethanol, CH <sub>3</sub> CH <sub>2</sub> OH                               | -20.96                   | 35              |
| para-cresol, <i>p</i> -CH <sub>3</sub> C <sub>6</sub> H <sub>4</sub> OH   | -25.69                   | 35              |
| ammonia, NH <sub>3</sub>                                                  | -17.95                   | 35              |
| methylamine, CH <sub>3</sub> NH <sub>2</sub>                              | -19.08                   | 35              |
| acetamide, CH <sub>3</sub> CONH <sub>2</sub>                              | -40.63                   | 35              |
| propionamide                                                              | -39.25                   | 35              |
| methane, CH <sub>4</sub>                                                  | 8.37                     | 35              |
| propane, CH <sub>3</sub> CH <sub>2</sub> CH <sub>3</sub>                  | 8.20                     | 35              |
| <i>n</i> -butane                                                          | 8.70                     | 35              |
| isobutane                                                                 | 9.71                     | 35              |
| toluene                                                                   | -3.72                    | 35              |
| metanthiol, CH <sub>3</sub> SH                                            | -5.19                    | 35              |
| methyl-ethyl-thioether, CH <sub>3</sub> SCH <sub>2</sub> CH <sub>3</sub>  | -6.19                    | 56              |
| 3-methylindole                                                            | -24.60                   | 56              |
| 4-methylimidazole                                                         | -42.97                   | 56              |
| N-propyl guanidine                                                        | -45.69                   | 19              |
| trifluoroethanol, CF <sub>3</sub> CH <sub>2</sub> OH                      | -18.03                   | 35              |
| <i>o</i> -chloro toluene, ClC <sub>6</sub> H <sub>4</sub> CH <sub>3</sub> | -4.81                    | 35              |
| H <sub>3</sub> O <sup>+</sup>                                             | -461.5                   | 57              |
| CH <sub>3</sub> OH <sub>2</sub> <sup>+</sup>                              | -389.1                   | 57              |
| CH <sub>3</sub> NH <sub>3</sub> <sup>+</sup>                              | -319.7                   | 57              |
| (CH <sub>3</sub> ) <sub>2</sub> NH <sub>2</sub> <sup>+</sup>              | -287.0                   | 57              |
| (CH <sub>3</sub> ) <sub>3</sub> NH <sup>+</sup>                           | -255.6                   | 57              |
| C <sub>6</sub> H <sub>5</sub> NH <sub>3</sub> <sup>+</sup>                | -302.9                   | 57              |
| CH <sub>3</sub> COHNH <sub>2</sub> <sup>+</sup>                           | -309.2                   | 57              |
| CH <sub>3</sub> SHCH <sub>3</sub> <sup>+</sup>                            | -269.9                   | 57              |
| imidazoleH <sup>+</sup>                                                   | -248.9                   | 57              |
| pyridineH <sup>+</sup>                                                    | -255.6                   | 37 <sup>a</sup> |
| OH <sup>-</sup>                                                           | -438.1                   | 57              |
| CH <sub>3</sub> O <sup>-</sup>                                            | -397.5                   | 57              |
| <i>m</i> -CH <sub>3</sub> C <sub>6</sub> H <sub>4</sub> O <sup>-</sup>    | -297.5                   | 57              |
| HCOO <sup>-</sup>                                                         | -318.8                   | 57              |
| CH <sub>3</sub> COO <sup>-</sup>                                          | -324.7                   | 57              |
| C <sub>6</sub> H <sub>5</sub> COO <sup>-</sup>                            | -297.9                   | 57              |
| CH <sub>3</sub> COCH <sub>2</sub> <sup>-</sup>                            | -318.8                   | 57              |
| CH <sub>3</sub> CONH <sup>-</sup>                                         | -335.6                   | 57              |
| C <sub>6</sub> H <sub>5</sub> NH <sup>-</sup>                             | -263.2                   | 57              |
| CH <sub>3</sub> S <sup>-</sup>                                            | -308.8                   | 57              |

<sup>a</sup> 18.8 kJ/mol was added to the value in ref.37 to use the same value of the absolute solvation energy of a proton as in ref. no. 57.

**Table S2.** Description of the 20 neutral drug-like molecules. The identifier, name, chemical formula, molecular weight, and starting structure (a PDB structure or conformational search) are listed.

| Name                        | Formula                                                                       | Mol. Weight | Starting structure  |
|-----------------------------|-------------------------------------------------------------------------------|-------------|---------------------|
| 061 (a biphenyl tetrazole)  | C <sub>26</sub> H <sub>24</sub> N <sub>6</sub> O <sub>2</sub>                 | 452.5       | 1a8t                |
| caffeine                    | C <sub>8</sub> H <sub>10</sub> N <sub>4</sub> O <sub>2</sub>                  | 194.2       | conformation search |
| cannabidiol                 | C <sub>21</sub> H <sub>30</sub> O <sub>2</sub>                                | 314.5       | conformation search |
| TPD (disulphonamide)        | C <sub>9</sub> H <sub>10</sub> N <sub>2</sub> O <sub>4</sub> S <sub>4</sub>   | 338.4       | 1bnw                |
| efavirenz                   | C <sub>14</sub> H <sub>9</sub> ClF <sub>3</sub> NO <sub>2</sub>               | 215.7       | 1jkh                |
| ethoxyresorufin             | C <sub>14</sub> H <sub>11</sub> NO <sub>3</sub>                               | 241.3       | conformation search |
| Gal3                        | C <sub>23</sub> H <sub>30</sub> F <sub>4</sub> N <sub>2</sub> O <sub>12</sub> | 602.5       | 2nn8                |
| MXA (methotrexate analogue) | C <sub>6</sub> H <sub>14</sub> O <sub>2</sub>                                 | 325.4       | 1dlr                |
| omeprazole                  | C <sub>17</sub> H <sub>19</sub> N <sub>3</sub> O <sub>3</sub> S               | 345.4       | conformation search |
| paclitaxel (taxol)          | C <sub>47</sub> H <sub>51</sub> NO <sub>14</sub>                              | 853.9       | 1jff                |
| paracetamol                 | C <sub>8</sub> H <sub>9</sub> NO <sub>2</sub>                                 | 151.2       | conformation search |
| phenolphthalein             | C <sub>20</sub> H <sub>14</sub> O <sub>4</sub>                                | 318.3       | conformation search |
| phenylbutazone              | C <sub>19</sub> H <sub>20</sub> N <sub>2</sub> O <sub>2</sub>                 | 308.4       | 2bxq                |
| progesterone                | C <sub>21</sub> H <sub>30</sub> O <sub>2</sub>                                | 314.5       | [90]                |
| quercetin                   | C <sub>15</sub> H <sub>10</sub> O <sub>7</sub>                                | 302.2       | 2o3p                |
| <i>R</i> -thalidomide       | C <sub>13</sub> H <sub>10</sub> N <sub>2</sub> O <sub>4</sub>                 | 258.2       | conformation search |
| SB3 (a diphenyl piperidine) | C <sub>28</sub> H <sub>35</sub> NO <sub>4</sub>                               | 449.6       | 1fkg                |
| <i>S</i> -warfarin          | C <sub>19</sub> H <sub>16</sub> O <sub>4</sub>                                | 308.3       | 1og5                |
| thiabendazole               | C <sub>10</sub> H <sub>7</sub> N <sub>3</sub> S                               | 201.2       | 1yvm                |
| Btn4                        | C <sub>13</sub> H <sub>20</sub> N <sub>2</sub> O <sub>5</sub> S               | 316.4       | 1avd                |

**Table S3.** Free energies of hydration (kJ/mol) calculated for the various molecules in the test set and with the various theoretical methods. The PCM methods are 1 – IEFPCM/UAHF, 2 – DPCM/UAHF, 3 – IEFPCM/UAKS, 4 – DPCM/UAHF, but with 6-31+G\* on all atoms. The PB methods are 1 – FF94/Tan2, 2 – FF94/Tan1, 3 – FF94/mbondi, 4 – FF94/Parse, 5 – FF03/Tan2, 6 – MK/Tan2, 7 – MK/mbondi. The GB methods are 1 – GB<sup>HCT</sup>/FF94/mbondi, 2 – GB<sup>HCT</sup>/FF03/mbondi, 3 – GB<sup>HCT</sup>/MK/mbondi, 4 – GB<sup>OBC1</sup>/FF94/mbondi, 5 – GB<sup>OBC2</sup>/FF94/mbondi, 6 – GBn/FF94/mbondi, 7 – GBn/FF03/mbondi, 8 – GBn/MK/mbondi, 9 – GBn/FF94/Tan2, 10 – GBn/FF94/Tan1, 11 – GBn/FF94/Parse.

| Molecule                                                               | PCM    |        |        |        |        | Chem Sol | PB     |        |        |        |        |        |        | GB     |        |        |        |        |        |        |        |        |        |        |
|------------------------------------------------------------------------|--------|--------|--------|--------|--------|----------|--------|--------|--------|--------|--------|--------|--------|--------|--------|--------|--------|--------|--------|--------|--------|--------|--------|--------|
|                                                                        | 1      | 2      | 3      | 4      | 5      |          | 1      | 2      | 3      | 4      | 5      | 6      | 7      | 1      | 2      | 3      | 4      | 5      | 6      | 7      | 8      | 9      | 10     | 11     |
| H <sub>2</sub> O                                                       | -26.4  | -26.7  | -26.4  | -24.1  | -25.1  | -23.3    | -33.4  | -24.5  | -25.8  | -53.4  | -45.0  | -22.3  | -24.5  | -53.4  | -56.2  | -52.0  | -56.2  | -37.7  | -36.5  | -30.0  | -27.6  | -30.0  | -28.6  | -29.9  |
| CH <sub>3</sub> OH                                                     | -21.4  | -21.1  | -21.5  | -19.3  | -20.0  | -18.6    | -21.5  | -13.1  | -12.0  | -34.7  | -28.3  | -12.1  | -11.9  | -33.3  | -30.7  | -29.1  | -29.4  | -24.7  | -22.9  | -19.6  | -17.6  | -18.5  | -20.3  | -19.2  |
| CH <sub>3</sub> CH <sub>2</sub> OH                                     | -21.0  | -21.9  | -22.4  | -20.4  | -21.3  | -19.5    | -17.4  | -9.2   | -8.5   | -29.1  | -24.2  | -9.0   | -9.0   | -29.0  | -25.4  | -25.0  | -25.0  | -19.9  | -17.9  | -14.6  | -13.8  | -14.9  | -14.7  | -14.0  |
| <i>p</i> -CH <sub>3</sub> C <sub>6</sub> H <sub>4</sub> OH             | -25.7  | -26.7  | -26.2  | -24.1  | -25.3  | -21.9    | -23.9  | -19.7  | -12.6  | -34.5  | -34.9  | -18.7  | -19.7  | -34.6  | -32.1  | -31.0  | -32.3  | -27.0  | -24.4  | -24.2  | -21.7  | -24.3  | -30.5  | -23.5  |
| NH <sub>3</sub>                                                        | -17.9  | -18.2  | -18.2  | -17.5  | -18.3  | -16.7    | -17.7  | -11.0  | -10.5  | -23.1  | -35.4  | -8.0   | -11.0  | -23.1  | -33.3  | -26.3  | -33.3  | -35.2  | -34.0  | -24.5  | -19.1  | -24.5  | -25.0  | -24.5  |
| CH <sub>3</sub> NH <sub>2</sub>                                        | -19.1  | -19.6  | -20.0  | -19.2  | -19.9  | -18.2    | -11.0  | -6.9   | -5.9   | -17.6  | -23.9  | -5.6   | -16.8  | -16.4  | -18.9  | -15.9  | -18.0  | -24.9  | -22.5  | -17.9  | -15.2  | -16.9  | -18.6  | -17.7  |
| CH <sub>3</sub> CONH <sub>2</sub>                                      | -40.6  | -39.8  | -39.3  | -37.7  | -39.4  | -36.4    | -43.6  | -38.2  | -33.3  | -38.7  | -56.8  | -43.5  | -37.9  | -38.5  | -42.8  | -46.0  | -42.7  | -50.3  | -46.6  | -47.9  | -52.1  | -47.8  | -52.2  | -47.4  |
| propionamide                                                           | -39.2  | -38.2  | -38.0  | -36.4  | -38.4  | -35.1    | -38.7  | -31.9  | -27.5  | -33.6  | -49.7  | -36.4  | -32.6  | -34.5  | -36.6  | -38.8  | -37.8  | -43.6  | -40.1  | -41.0  | -44.3  | -42.0  | -45.0  | -40.6  |
| CH <sub>4</sub>                                                        | 8.4    | 7.8    | 4.7    | 4.6    | 4.5    | 4.7      | 7.7    | 11.6   | 7.2    | 6.1    | 5.8    | 11.6   | 11.5   | 6.0    | 3.7    | 3.7    | 3.6    | 4.0    | 3.9    | 5.9    | 5.9    | 5.9    | 11.0   | 6.6    |
| propane                                                                | 8.2    | 8.3    | 8.2    | 8.1    | 7.9    | 8.2      | 8.7    | 12.7   | 9.2    | 8.4    | 8.0    | 12.7   | 12.6   | 8.2    | 7.9    | 7.9    | 7.6    | 7.3    | 7.5    | 8.1    | 8.0    | 8.0    | 12.3   | 8.8    |
| <i>n</i> -butane                                                       | 8.7    | 8.9    | 8.9    | 8.7    | 8.6    | 8.9      | 9.2    | 13.0   | 10.0   | 9.0    | 8.8    | 13.0   | 12.9   | 8.7    | 8.1    | 8.3    | 7.4    | 7.5    | 7.6    | 8.5    | 8.4    | 8.0    | 12.5   | 9.5    |
| isobutane                                                              | 9.7    | 10.0   | 9.9    | 9.8    | 9.6    | 10.0     | 8.7    | 11.6   | 9.2    | 7.5    | 6.8    | 11.7   | 11.8   | 7.6    | 5.6    | 6.0    | 6.1    | 4.4    | 4.7    | 8.5    | 8.3    | 8.4    | 11.8   | 9.3    |
| toluene                                                                | -3.7   | -4.5   | -4.5   | -3.9   | -4.2   | -2.1     | -6.1   | -2.5   | 0.6    | -5.7   | -10.8  | -1.3   | -2.5   | -5.8   | -5.6   | -4.1   | -5.7   | -9.2   | -7.8   | -8.8   | -6.8   | -8.9   | -11.1  | -8.0   |
| CH <sub>3</sub> SH                                                     | -5.2   | -5.4   | -5.7   | -6.1   | -6.0   | -5.4     | -4.7   | -3.3   | -1.2   | -10.3  | -7.8   | -3.8   | -2.8   | -9.8   | -8.6   | -9.4   | -8.1   | -7.6   | -6.9   | -6.8   | -7.5   | -6.4   | -8.5   | -6.4   |
| CH <sub>3</sub> SC <sub>2</sub> H <sub>5</sub>                         | -6.2   | -7.0   | -7.6   | -7.6   | -7.6   | -6.7     | -3.9   | 1.0    | 1.9    | -1.2   | -2.1   | 0.0    | -0.7   | -3.6   | -0.4   | -1.5   | -3.3   | -2.6   | -1.9   | -1.5   | -2.9   | -4.2   | -1.7   | -0.8   |
| 3-methylindol                                                          | -24.6  | -20.8  | -20.6  | -24.2  | -25.6  | -20.8    | -24.9  | -21.0  | -12.7  | -22.1  | -35.3  | -21.9  | -21.0  | -22.2  | -22.0  | -22.6  | -22.2  | -28.1  | -25.3  | -30.6  | -30.9  | -30.8  | -38.2  | -30.0  |
| 4-methyl-imidazole                                                     | -43.0  | -38.4  | -37.7  | -41.5  | -43.1  | -39.2    | -34.2  | -32.0  | -25.0  | -35.2  | -48.6  | -37.3  | -31.4  | -34.6  | -36.5  | -42.3  | -36.0  | -42.7  | -39.5  | -46.5  | -52.5  | -45.9  | -52.6  | -45.6  |
| N-propyl guanidine                                                     | -45.7  | -45.1  | -42.0  | -39.4  | -40.6  | -36.9    | -24.2  | -14.4  | -7.9   | -36.9  | -60.6  | -29.4  | -14.9  | -37.0  | -34.5  | -32.0  | -35.1  | -42.3  | -36.1  | -43.8  | -42.2  | -44.0  | -49.8  | -43.2  |
| CF <sub>3</sub> CH <sub>2</sub> OH                                     | -18.0  | -25.4  | -25.9  | -21.5  | -21.3  | -20.7    | -22.8  | -19.8  | -17.5  | -35.6  | -30.9  | -18.7  | -19.1  | -34.8  | -34.7  | -32.2  | -33.3  | -26.4  | -23.4  | -29.0  | -24.7  | -28.4  | -30.7  | -28.4  |
| <i>o</i> -Cl-toluene                                                   | -4.8   | -3.2   | -3.3   | -2.3   | -2.5   | -0.5     | -7.2   | -8.1   | -1.4   | -4.3   | -8.5   | -6.9   | -8.0   | -4.4   | -4.8   | -3.4   | -4.9   | -8.3   | -7.0   | -8.9   | -6.9   | -9.0   | -14.8  | -8.1   |
| H <sub>3</sub> O <sup>+</sup>                                          | -461.5 | -442.2 | -444.5 | -441.6 | -447.7 | -441.1   | -411.7 | -407.3 | -408.6 | -509.2 | -455.0 | -402.8 | -407.4 | -509.2 | -554.6 | -546.4 | -554.7 | -402.7 | -394.4 | -376.3 | -375.7 | -376.3 | -375.1 | -376.4 |
| CH <sub>3</sub> OH <sub>2</sub> <sup>+</sup>                           | -389.1 | -360.8 | -370.2 | -371.8 | -379.7 | -371.1   | -336.6 | -297.2 | -296.3 | -383.6 | -347.5 | -303.0 | -297.2 | -383.7 | -402.8 | -411.5 | -402.9 | -326.3 | -320.6 | -310.0 | -314.6 | -310.1 | -310.7 | -309.9 |
| CH <sub>3</sub> NH <sub>3</sub> <sup>+</sup>                           | -319.7 | -293.5 | -296.0 | -296.2 | -297.5 | -296.1   | -310.7 | -245.3 | -242.3 | -301.9 | -302.3 | -247.3 | -245.3 | -301.8 | -293.2 | -296.8 | -293.2 | -303.8 | -298.4 | -317.2 | -321.7 | -317.2 | -320.4 | -317.3 |
| (CH <sub>3</sub> ) <sub>2</sub> NH <sub>2</sub> <sup>+</sup>           | -287.0 | -270.8 | -274.1 | -274.2 | -275.7 | -274.2   | -283.4 | -237.9 | -233.4 | -265.8 | -274.0 | -239.4 | -238.1 | -267.0 | -258.8 | -262.2 | -260.4 | -272.1 | -267.1 | -282.3 | -286.7 | -283.7 | -286.8 | -282.3 |
| (CH <sub>3</sub> ) <sub>3</sub> NH <sup>+</sup>                        | -255.6 | -244.8 | -247.8 | -247.9 | -249.5 | -247.8   | -262.8 | -227.3 | -222.1 | -237.6 | -254.3 | -227.9 | -227.3 | -239.0 | -229.0 | -230.5 | -231.0 | -243.5 | -238.6 | -250.5 | -252.4 | -252.8 | -255.3 | -250.1 |
| C <sub>6</sub> H <sub>5</sub> NH <sub>3</sub> <sup>+</sup>             | -302.9 | -268.4 | -269.7 | -267.6 | -268.9 | -265.7   | -282.3 | -226.6 | -219.2 | -260.8 | -279.7 | -233.2 | -226.7 | -260.8 | -246.4 | -257.3 | -246.3 | -257.0 | -250.5 | -278.4 | -290.4 | -278.5 | -285.2 | -277.9 |
| CH <sub>3</sub> COHNH <sub>2</sub> <sup>+</sup>                        | -309.2 | -285.3 | -284.7 | -282.0 | -284.1 | -281.4   | -286.0 | -240.3 | -235.5 | -300.3 | -313.7 | -246.5 | -241.0 | -302.2 | -299.8 | -297.3 | -301.7 | -281.8 | -275.1 | -289.8 | -286.5 | -290.7 | -294.1 | -289.2 |
| CH <sub>3</sub> SHCH <sub>3</sub> <sup>+</sup>                         | -269.9 | -256.6 | -257.2 | -257.1 | -259.5 | -255.8   | -262.8 | -238.7 | -236.9 | -270.5 | -266.9 | -240.5 | -237.9 | -269.3 | -262.4 | -266.8 | -261.1 | -260.3 | -255.4 | -270.5 | -272.7 | -269.6 | -271.9 | -270.1 |
| imidazoleH <sup>+</sup>                                                | -248.9 | -259.5 | -261.5 | -273.4 | -275.1 | -272.0   | -272.5 | -250.2 | -241.2 | -257.6 | -298.6 | -249.4 | -250.2 | -257.6 | -256.3 | -257.0 | -256.3 | -269.3 | -265.4 | -281.5 | -281.7 | -281.5 | -290.1 | -281.1 |
| pyridineH <sup>+</sup>                                                 | -255.6 | -233.9 | -234.9 | -241.2 | -242.1 | -240.0   | -257.4 | -230.0 | -223.9 | -237.2 | -268.3 | -230.8 | -230.0 | -237.2 | -235.3 | -237.8 | -235.3 | -248.2 | -244.7 | -255.7 | -257.8 | -255.8 | -261.3 | -255.2 |
| OH <sup>-</sup>                                                        | -438.1 | -452.4 | -440.8 | -455.3 | -429.1 | -452.2   | -455.7 | -368.9 | -370.2 | -464.7 | -499.9 | -371.8 | -368.9 | -464.7 | -491.0 | -496.8 | -491.0 | -497.3 | -496.1 | -481.8 | -488.6 | -481.8 | -480.3 | -481.6 |
| CH <sub>3</sub> O <sup>-</sup>                                         | -397.5 | -393.0 | -368.9 | -355.1 | -347.6 | -352.3   | -375.0 | -304.5 | -303.5 | -367.2 | -381.4 | -305.9 | -304.5 | -367.1 | -363.0 | -365.4 | -363.0 | -384.5 | -378.0 | -376.9 | -379.9 | -376.9 | -377.4 | -376.4 |
| <i>m</i> -CH <sub>3</sub> C <sub>6</sub> H <sub>4</sub> O <sup>-</sup> | -297.5 | -298.5 | -279.4 | -263.6 | -265.6 | -259.6   | -312.0 | -236.1 | -229.6 | -285.3 | -299.0 | -244.2 | -236.1 | -285.4 | -288.7 | -298.6 | -289.0 | -299.6 | -293.7 | -297.6 | -307.3 | -298.0 | -303.4 | -296.9 |
| HCOO <sup>-</sup>                                                      | -318.8 | -321.7 | -311.3 | -303.2 | -296.8 | -302.4   | -361.4 | -411.4 | -405.9 | -341.7 | -364.4 | -408.3 | -411.5 | -341.7 | -348.0 | -347.4 | -348.0 | -360.8 | -355.2 | -356.8 | -355.8 | -356.8 | -361.7 | -356.2 |
| CH <sub>3</sub> COO <sup>-</sup>                                       | -324.7 | -328.6 | -315.7 | -304.7 | -301.1 | -303.4   | -357.6 | -393.4 | -388.7 | -334.1 | -354.8 | -398.9 | -393.4 | -334.2 | -339.3 | -343.3 | -339.4 | -351.3 | -345.5 | -344.7 | -349.2 | -344.7 | -348.7 | -344.1 |
| C <sub>6</sub> H <sub>5</sub> COO <sup>-</sup>                         | -297.9 | -304.8 | -287.5 | -271.9 | -274.3 | -269.6   | -330.1 | -353.6 | -342.9 | -304.2 | -325.4 | -371.0 | -353.7 | -304.3 | -305.7 | -320.0 | -305.8 | -318.8 | -311.9 | -317.9 | -331.8 | -317.9 | -327.9 | -317.2 |
| CH <sub>3</sub> COCH <sub>2</sub> <sup>-</sup>                         | -318.8 | -271.5 | -263.3 | -266.1 | -263.8 | -264.2   | -331.1 | -286.1 | -285.3 | -319.9 | -333.7 | -290.3 | -286.6 | -320.9 | -331.6 | -337.3 | -333.0 | -340.9 | -335.8 | -322.6 | -327.0 | -323.4 | -322.6 | -321.8 |
| CH <sub>3</sub> CONH <sup>-</sup>                                      | -335.6 | -311.2 | -301.5 | -291.7 | -291.7 | -288.6   | -329.8 | -298.4 | -294.0 | -337.8 | -357.0 | -300.4 | -298.5 | -337.8 | -345.0 | -346.0 | -345.0 | -359.8 | -352.6 | -345.4 | -346.4 | -345.4 | -349.2 | -344.9 |
| C <sub>6</sub> H <sub>5</sub> NH <sup>-</sup>                          | -263.2 | -254.3 | -251.0 | -252.0 | -253.0 | -247.4   | -293.7 | -251.6 | -245.1 | -292.7 | -302.7 | -257.4 | -255.6 | -298.5 | -296.0 | -303.0 | -302.5 | -309.0 | -302.1 | -302.4 | -309.0 | -308.8 | -308.3 | -301.7 |
| CH <sub>3</sub> S <sup>-</sup>                                         | -308.8 | -315.3 | -297.0 | -310.7 | -291.8 | -308.9   | -310.6 | -420.4 | -418.8 | -356.5 | -343.3 | -443.8 | -420.4 | -356.6 | -362.3 | -374.9 | -362.3 | -373.4 | -369.1 | -359.2 | -371.8 | -359.2 | -360.3 | -358.7 |

**Table S4.** Free energies of hydration (kJ/mol) calculated for the drug-like molecules with the various theoretical methods. Ch is the net charge of the molecule. The methods are the same as in Table S3.

| Molecule                | Ch | PCM    |        |        |        |        | Chem Sol | PB     |        |        |        |        |        |        | GB     |        |        |        |        |        |        |        |        |        |        | Av.    |
|-------------------------|----|--------|--------|--------|--------|--------|----------|--------|--------|--------|--------|--------|--------|--------|--------|--------|--------|--------|--------|--------|--------|--------|--------|--------|--------|--------|
|                         |    | 1      | 2      | 3      | 4      | 5      |          | 1      | 2      | 3      | 4      | 5      | 6      | 7      | 1      | 2      | 3      | 4      | 5      | 6      | 7      | 8      | 9      | 10     | 11     |        |
| 061                     | 0  | -64.6  | -59.8  | -59.7  | -61.6  | -55.9  | -88.9    | -99.9  | -66.4  | -111.4 | -131.4 | -105.9 | -103.6 | -117.2 | -106.1 | -114.7 | -111.8 | -110.1 | -98.1  | -126.4 | -133.7 | -135.3 | -158.5 | -125.0 | -127.0 | -76.0  |
| caffeine                | 0  | -39.7  | -38.2  | -36.2  | -36.4  | -35.2  | -53.1    | -63.4  | -43.2  | -55.5  | -70.3  | -62.3  | -62.5  | -54.6  | -50.9  | -50.4  | -50.3  | -63.9  | -58.3  | -63.5  | -62.8  | -63.3  | -83.1  | -62.8  | -63.8  | -44.1  |
| cannabidiol             | 0  | -8.6   | -5.1   | -4.0   | -6.9   | -0.4   | -25.2    | -18.9  | -10.6  | -39.1  | -44.5  | -19.9  | -20.1  | -44.0  | -43.2  | -46.2  | -48.7  | -34.4  | -30.0  | -24.9  | -25.6  | -28.1  | -31.6  | -23.3  | -25.4  | -12.4  |
| TPD                     | 0  | -84.5  | -87.9  | -81.5  | -83.2  | -78.3  | -84.5    | -192.0 | -161.8 | -88.9  | -133.1 | -178.3 | -191.7 | -89.4  | -78.4  | -69.7  | -79.2  | -93.6  | -82.4  | -119.1 | -106.2 | -120.2 | -148.6 | -118.5 | -119.5 | -92.4  |
| efavirenz               | 0  | -19.7  | -22.7  | -22.9  | -24.9  | -20.4  | -51.6    | -47.0  | -30.7  | -40.4  | -57.9  | -50.4  | -47.2  | -40.5  | -41.7  | -43.9  | -41.7  | -50.7  | -45.7  | -58.0  | -58.5  | -58.5  | -73.4  | -57.0  | -58.1  | -31.9  |
| ethoxyresorufin         | 0  | -37.5  | -36.4  | -32.2  | -35.6  | -30.5  | -40.9    | -49.7  | -29.3  | -40.0  | -56.9  | -54.7  | -50.2  | -40.6  | -39.6  | -43.9  | -40.0  | -50.8  | -44.6  | -58.6  | -61.3  | -59.4  | -77.9  | -57.5  | -59.1  | -39.4  |
| MXA                     | 0  | -77.2  | -73.8  | -71.3  | -74.9  | -65.6  | -70.6    | -80.7  | -50.8  | -86.1  | -117.3 | -84.2  | -80.1  | -85.6  | -75.7  | -76.8  | -75.3  | -89.4  | -77.7  | -112.5 | -113.3 | -112.5 | -141.6 | -111.8 | -112.9 | -78.4  |
| omeprazole              | 0  | -33.2  | -30.4  | -33.3  | -33.4  | -29.6  | -53.6    | -72.7  | -46.6  | -66.0  | -90.9  | -71.7  | -72.5  | -65.6  | -56.8  | -56.0  | -56.4  | -70.7  | -61.7  | -86.8  | -85.1  | -87.1  | -111.7 | -85.5  | -87.1  | -44.3  |
| paclitaxel <sup>†</sup> | 0  |        | 36.6   | 48.5   | 48.3   | 52.0   | -113.7   | -134.3 | -93.6  | -166.7 | -197.8 | -125.5 | -136.5 | -171.5 | -150.2 | -133.7 | -155.7 | -137.2 | -111.6 | -103.0 | -87.2  | -102.6 | -142.4 | -101.6 | -103.4 | -6.3   |
| paracetamol             | 0  | -53.0  | -52.0  | -51.3  | -54.2  | -48.2  | -57.4    | -48.6  | -36.9  | -62.8  | -73.2  | -52.8  | -52.0  | -71.1  | -61.2  | -66.2  | -69.6  | -60.6  | -55.4  | -59.8  | -63.3  | -67.1  | -70.8  | -59.1  | -60.2  | -54.5  |
| phenolphthalein         | 0  | -60.9  | -56.7  | -50.2  | -53.4  | -45.6  | -84.0    | -80.9  | -58.8  | -101.4 | -112.1 | -84.6  | -87.0  | -115.6 | -98.4  | -103.5 | -112.5 | -90.7  | -82.9  | -89.6  | -88.2  | -99.3  | -110.9 | -88.8  | -90.2  | -65.1  |
| phenylbutazone          | 0  | -11.4  | -11.5  | -8.4   | -9.3   | -5.4   | -46.4    | -40.3  | -27.8  | -45.1  | -62.9  | -39.8  | -41.1  | -46.2  | -43.0  | -40.9  | -43.9  | -56.3  | -50.4  | -56.2  | -52.6  | -56.8  | -67.3  | -54.9  | -56.9  | -22.0  |
| progesterone            | 0  | -30.2  | -30.0  | -26.6  | -30.0  | -25.1  | -54.7    | -51.9  | -32.6  | -37.5  | -49.1  | -56.9  | -51.2  | -37.0  | -36.2  | -41.1  | -36.2  | -46.0  | -42.3  | -41.2  | -46.8  | -41.2  | -59.4  | -40.1  | -41.5  | -34.8  |
| quercetin               | 0  | -82.6  | -75.1  | -68.3  | -69.0  | -64.3  | -69.2    | -102.1 | -68.1  | -157.4 | -145.2 | -101.8 | -102.5 | -158.1 | -161.1 | -155.0 | -162.1 | -107.3 | -95.6  | -100.3 | -93.1  | -101.4 | -133.7 | -99.7  | -100.8 | -80.0  |
| R-thalidomide           | 0  | -57.4  | -59.6  | -58.3  | -61.9  | -56.3  | -80.9    | -80.9  | -57.1  | -78.0  | -104.7 | -79.5  | -80.9  | -77.8  | -77.9  | -76.9  | -77.8  | -94.2  | -86.5  | -93.9  | -91.9  | -93.8  | -116.9 | -93.0  | -94.4  | -67.7  |
| SB3                     | 0  | 33.0   | 36.3   | 36.5   | 34.9   | 40.0   | -43.7    | -37.2  | -22.5  | -37.2  | -56.1  | -34.1  | -39.1  | -39.9  | -40.3  | -34.0  | -43.5  | -53.3  | -45.1  | -46.8  | -40.0  | -50.3  | -60.2  | -45.5  | -47.5  | 10.6   |
| S-warfarin              | 0  | -37.5  | -36.4  | -29.9  | -29.8  | -26.1  | -76.0    | -74.1  | -55.8  | -86.4  | -97.8  | -76.1  | -74.5  | -86.0  | -85.3  | -86.0  | -85.5  | -82.7  | -74.3  | -80.0  | -78.9  | -80.2  | -97.3  | -79.0  | -80.6  | -46.8  |
| thiabendazole           | 0  | -61.7  | -59.1  | -60.3  | -62.3  | -56.5  | -56.9    | -66.2  | -44.7  | -60.2  | -81.8  | -76.2  | -66.3  | -60.4  | -58.2  | -67.7  | -58.4  | -69.6  | -63.0  | -89.8  | -100.3 | -90.1  | -110.4 | -88.9  | -90.1  | -64.1  |
| Btn1                    | -1 | -379.4 | -367.7 | -344.1 | -353.8 | -339.7 | -391.7   | -416.9 | -394.1 | -350.5 | -387.6 | -445.2 | -416.8 | -350.4 | -345.6 | -367.1 | -345.6 | -363.8 | -353.3 | -363.3 | -384.6 | -363.5 | -385.2 | -362.4 | -363.7 | -365.4 |
| Btn2                    | -1 | -372.6 | -375.3 | -348.1 | -362.4 | -342.3 | -397.1   | -419.2 | -397.7 | -368.1 | -407.5 | -447.6 | -418.4 | -367.3 | -361.5 | -382.3 | -361.1 | -381.7 | -369.6 | -379.0 | -399.1 | -378.6 | -399.9 | -378.4 | -379.4 | -371.1 |
| Btn3                    | -1 | -350.8 | -347.3 | -324.9 | -332.7 | -321.5 | -385.3   | -406.5 | -389.2 | -346.7 | -386.0 | -426.9 | -405.7 | -345.7 | -344.5 | -362.6 | -343.6 | -363.2 | -352.5 | -359.6 | -377.0 | -358.7 | -376.2 | -358.9 | -360.3 | -348.6 |
| Btn4                    | 0  | -78.5  | -85.7  | -80.1  | -82.0  | -77.3  | -93.6    | -85.4  | -62.5  | -85.6  | -106.3 | -92.7  | -85.6  | -86.0  | -76.7  | -82.8  | -77.5  | -93.8  | -85.7  | -88.4  | -94.3  | -89.7  | -110.3 | -87.4  | -88.9  | -84.0  |
| Btn5                    | 0  | -56.7  | -58.7  | -54.3  | -56.5  | -51.1  | -37.7    | -34.6  | -24.7  | -46.1  | -65.3  | -43.6  | -34.2  | -45.8  | -42.2  | -46.3  | -42.2  | -50.2  | -44.5  | -51.3  | -53.8  | -51.1  | -60.3  | -50.4  | -51.7  | -52.2  |
| Btn6                    | 0  | -44.1  | -45.1  | -41.3  | -42.9  | -39.8  | -54.1    | -38.9  | -28.5  | -37.8  | -49.1  | -50.4  | -38.9  | -37.8  | -36.8  | -41.5  | -36.8  | -43.3  | -39.6  | -41.6  | -46.4  | -41.6  | -50.9  | -40.5  | -41.9  | -43.8  |
| Btn7                    | 0  | -61.7  | -62.8  | -61.4  | -63.3  | -59.2  | -52.0    | -52.6  | -41.1  | -43.0  | -59.8  | -59.2  | -52.8  | -43.3  | -42.6  | -48.8  | -42.8  | -48.6  | -45.0  | -51.8  | -57.4  | -52.1  | -63.0  | -51.4  | -52.1  | -58.8  |
| FXa39                   | 1  |        | -273.7 | -265.1 | -246.3 | -257.4 | -321.2   | -401.4 | -370.0 | -285.6 | -343.4 | -406.3 | -407.8 | -288.7 | -274.1 | -281.9 | -277.4 | -281.7 | -266.8 | -304.4 | -309.5 | -308.2 | -334.7 | -303.3 | -304.9 | -278.7 |
| FXa57                   | 1  | -198.7 | -194.8 | -194.1 | -194.8 | -187.3 | -246.9   | -332.6 | -300.2 | -203.9 | -269.6 | -427.6 | -346.5 | -210.9 | -201.4 | -201.5 | -209.3 | -220.0 | -206.7 | -239.7 | -237.1 | -250.2 | -271.3 | -238.9 | -240.4 | -215.0 |
| FXa63                   | 1  |        | -273.0 | -266.6 | -247.7 | -258.8 | -312.6   | -394.2 | -364.0 | -280.0 | -337.4 | -399.8 | -400.9 | -283.5 | -270.0 | -278.5 | -273.5 | -276.7 | -262.5 | -298.9 | -304.6 | -303.2 | -328.1 | -298.0 | -299.7 | -277.4 |
| FXa103                  | 1  | -262.8 | -271.3 | -265.5 | -245.7 | -257.7 | -310.8   | -394.4 | -363.6 | -279.5 | -337.5 | -400.3 | -401.5 | -283.1 | -269.0 | -277.8 | -272.6 | -276.1 | -261.8 | -298.4 | -304.8 | -302.8 | -328.2 | -297.4 | -299.1 | -276.7 |
| FXa127                  | 1  | -229.3 | -226.6 | -226.3 | -225.3 | -221.4 | -264.5   | -357.0 | -337.6 | -226.6 | -282.6 | -366.0 | -356.9 | -226.9 | -216.1 | -227.9 | -216.8 | -233.9 | -223.1 | -253.3 | -264.1 | -254.0 | -271.8 | -252.4 | -253.9 | -240.0 |
| FXa9                    | 2  | -589.4 | -590.2 | -589.3 | -583.2 | -582.0 | -609.1   | -848.9 | -812.6 | -569.8 | -670.5 | -850.7 | -856.7 | -572.6 | -553.5 | -568.1 | -556.6 | -578.5 | -561.9 | -625.6 | -636.0 | -630.1 | -661.2 | -624.8 | -626.2 | -605.9 |
| FXa47                   | 2  | -598.0 | -596.9 | -595.8 | -584.5 | -587.9 | -608.7   | -833.7 | -800.4 | -569.9 | -672.8 | -839.9 | -844.4 | -573.4 | -552.5 | -567.4 | -556.2 | -578.3 | -561.6 | -622.8 | -633.4 | -627.6 | -655.3 | -622.0 | -623.6 | -608.6 |
| FXa49                   | 2  | -596.8 | -595.9 | -600.3 | -593.3 | -593.3 | -607.6   | -838.8 | -803.1 | -577.2 | -690.5 | -838.7 | -850.0 | -581.7 | -561.6 | -567.5 | -566.0 | -590.1 | -571.7 | -634.5 | -636.2 | -640.4 | -669.7 | -634.0 | -635.4 | -613.5 |
| FXa50                   | 2  | -628.1 | -623.9 | -620.4 | -607.2 | -611.2 | -624.7   | -861.0 | -823.3 | -611.3 | -710.0 | -867.4 | -868.2 | -614.4 | -595.7 | -608.3 | -598.9 | -608.1 | -589.6 | -651.6 | -660.7 | -655.3 | -688.7 | -651.0 | -652.5 | -634.1 |
| FXa53                   | 2  | -602.3 | -601.4 | -600.2 | -588.9 | -592.3 | -609.5   | -836.8 | -803.4 | -573.7 | -678.0 | -843.0 | -847.5 | -577.5 | -556.6 | -571.2 | -560.3 | -582.9 | -566.0 | -628.3 | -638.7 | -633.4 | -660.9 | -627.6 | -629.2 | -612.7 |
| FXa125                  | 2  | -586.6 | -593.0 | -591.1 | -587.7 | -583.9 | -606.7   | -842.5 | -810.0 | -572.5 | -673.2 | -840.5 | -853.2 | -575.4 | -554.5 | -566.5 | -557.7 | -581.2 | -564.0 | -623.8 | -631.8 | -628.4 | -655.8 | -623.3 | -624.8 | -606.5 |
| lactose                 | 0  | -135.4 | -139.7 | -124.5 | -132.8 | -119.2 | -98.8    | -115.5 | -84.4  | -217.5 | -191.3 | -111.0 | -116.2 | -218.6 | -178.5 | -165.4 | -179.9 | -124.5 | -106.5 | -85.3  | -80.0  | -85.6  | -116.0 | -84.9  | -85.9  | -124.4 |
| Gal2                    | 0  |        | -147.8 | -129.5 | -140.5 | -123.8 | -167.6   | -142.9 | -112.9 | -208.9 | -221.2 | -146.3 | -144.1 | -212.1 | -182.8 | -177.8 | -184.7 | -159.2 | -140.7 | -134.0 | -131.6 | -136.0 | -163.0 | -133.0 | -134.6 | -142.7 |
| Gal3                    | 0  |        | -143.3 | -122.8 | -134.1 | -117.5 | -171.2   | -156.7 | -123.6 | -211.5 | -228.1 | -155.3 | -157.1 | -214.1 | -188.0 | -182.2 | -191.3 | -166.0 | -146.8 | -148.4 | -143.4 | -149.0 | -180.0 | -146.9 | -148.8 | -141.2 |
| Gal4                    | 0  |        | -142.7 | -121.1 | -129.5 | -116.3 | -163.8   | -151.8 | -120.9 | -207.1 | -221.8 | -151.9 | -149.4 | -209.8 | -185.2 | -180.3 | -188.3 | -161.4 | -142.7 | -145.7 | -141.9 | -146.4 | -175.2 | -144.4 | -146.3 | -137.9 |
| Gal5                    | 0  |        | -147.2 | -127.7 | -134.9 | -122.4 | -169.7   | -154.7 | -124.5 | -214.7 | -226.7 | -155.6 | -152.1 | -215.5 | -188.8 | -184.1 | -189.7 | -164.5 | -145.3 | -146.9 | -144.0 | -146.1 | -176.1 | -145.9 | -147.7 | -142.9 |
| Gal6                    | 0  |        | -147.5 | -132.3 | -139.3 | -126.1 | -161.2   | -148.2 | -117.3 | -208.8 | -223.9 | -151.5 | -148.7 | -211.4 | -184.8 | -179.9 | -186.5 | -161.6 | -142.4 | -139.8 | -136.9 | -141.5 | -169.5 | -138.7 | -140.5 | -143.4 |

**Table S5.** MADs for the solvation free energies of the drug-like molecules for each method, calculated relative to the plain average (cf. Table 4 that gives the same results for the method-weighted average). The MADs were calculated either for the 20 neutral drug-like molecules, for all molecules in the three series (avidin, factor Xa, or galectin-3 inhibitors; called “All 3” in the Table), or individually for these three targets (avidin, FXa, and Gal). Moreover, the MADs were calculated for the relative solvation energies, either separately for the avidin, factor Xa, and galectin-3 inhibitors (Target), or separately for each total charge in these three series (Charge; in this case, lactose was omitted from the galectin-3 series).

| Method                           | Neutral |       | 3 Inhibitors |       |      | Target Charges |       |
|----------------------------------|---------|-------|--------------|-------|------|----------------|-------|
|                                  | drugs   | All 3 | Avidin       | FXa   | Gal  | All 3          | All 3 |
| DPCM/HF                          | 22.3    | 26.3  | 8.3          | 42.6  | 6.3  | 6.5            | 7.2   |
| IEFPCM/HF                        | 28.8    | 24.2  | 7.6          | 40.8  | 13.0 | 8.7            | 4.0   |
| IEFPCM/PBE0/HF                   | 32.8    | 31.9  | 17.7         | 43.1  | 27.9 | 11.0           | 4.4   |
| IEFPCM/PBE0/PBE0                 | 30.4    | 33.3  | 13.5         | 52.9  | 20.2 | 10.2           | 5.5   |
| IEFPCM/B3LYP                     | 36.1    | 37.2  | 19.5         | 50.5  | 33.3 | 11.3           | 4.4   |
| ChemSol                          | 10.6    | 16.5  | 12.2         | 22.0  | 11.3 | 18.1           | 3.8   |
| PB/FF94/Tan2                     | 10.6    | 77.0  | 20.2         | 150.2 | 9.2  | 34.5           | 3.7   |
| PB/FF94/Tan1                     | 22.3    | 69.8  | 19.2         | 118.1 | 40.2 | 32.2           | 4.7   |
| PB/FF94/mbondi                   | 14.8    | 39.7  | 10.1         | 49.0  | 57.2 | 14.3           | 3.2   |
| PB/FF94/Parse                    | 27.5    | 36.6  | 16.2         | 34.2  | 64.7 | 7.4            | 3.7   |
| PB/FF03/Tan2                     | 9.7     | 86.3  | 32.3         | 162.8 | 8.9  | 34.4           | 8.3   |
| PB/MK/Tan2                       | 10.2    | 80.9  | 20.0         | 158.6 | 9.6  | 35.1           | 3.4   |
| PB/MK/mbondi                     | 17.0    | 38.7  | 10.3         | 45.4  | 59.4 | 14.5           | 3.1   |
| GB <sup>HCT</sup> /FF94/mbondi   | 14.8    | 40.2  | 14.1         | 62.2  | 30.5 | 16.2           | 2.5   |
| GB <sup>HCT</sup> /FF03/mbondi   | 13.2    | 30.6  | 2.4          | 52.1  | 24.1 | 13.5           | 2.6   |
| GB <sup>HCT</sup> /MK/mbondi     | 17.1    | 39.1  | 14.1         | 58.5  | 32.5 | 16.4           | 2.5   |
| GB <sup>OBC1</sup> /FF94/mbondi2 | 9.6     | 22.0  | 3.6          | 43.8  | 3.6  | 12.5           | 1.9   |
| GB <sup>OBC2</sup> /FF94/mbondi2 | 7.6     | 33.9  | 8.3          | 59.4  | 16.8 | 13.8           | 1.8   |
| GBn/FF94/Bondi                   | 11.1    | 10.7  | 3.4          | 9.8   | 20.8 | 8.4            | 1.8   |
| GBn/FF03/Bondi                   | 12.9    | 10.8  | 9.2          | 4.3   | 24.6 | 8.3            | 2.0   |
| GBn/MK/Bondi                     | 12.8    | 9.1   | 3.7          | 6.5   | 20.1 | 8.6            | 2.2   |
| GBn/FF94/Tan2                    | 30.9    | 17.3  | 13.9         | 21.5  | 13.5 | 8.1            | 3.3   |
| GBn/FF94/Tan1                    | 10.5    | 11.4  | 3.6          | 10.6  | 21.9 | 8.3            | 1.8   |
| GBn/FF94/Parse                   | 11.4    | 10.1  | 3.2          | 9.1   | 20.2 | 8.4            | 1.8   |

**Table S6.** Standard deviation (Stdev) and ranges among the solvation free energies of either all methods or only the 5 PCM methods. The results are presented as averages over the 20 neutral small molecules, the 20 neutral drug-like molecules, or the three series of inhibitors (avidin, factor Xa, or galectin-3 inhibitors), the latter either individually (called All 3) or individually. In addition, the standard deviations and ranges were calculated also for the relative solvation energies, either separately for the avidin, factor Xa, and galectin-3 inhibitors (Target), or separately for each total charge in these three series (Charge; in this case, lactose was omitted from the galectin-3 series).

| Molecules     | Subset     | All methods |       | PCM   |       |
|---------------|------------|-------------|-------|-------|-------|
|               |            | Stdev       | Range | Stdev | Range |
| Neutral small |            | 5.0         | 19.3  | 1.2   | 3.0   |
| Neutral drugs |            | 22.3        | 80.1  | 3.8   | 9.4   |
| Inhibitors    | All 3      | 45.0        | 155.8 | 7.8   | 18.3  |
|               | Avidin     | 25.1        | 105.4 | 14.8  | 34.0  |
|               | FXa        | 48.0        | 172.1 | 7.8   | 19.5  |
|               | Galectin-3 | 30.7        | 112.3 | 10.4  | 23.8  |
| Target        | All 3      | 17.6        | 61.9  | 9.3   | 22.3  |
| Charge        | All 3      | 4.7         | 19.1  | 3.0   | 7.3   |

**Figure S1.** Structures of the 20 neutral drug-like molecules (except Gal3 and Btn4, which are shown in Figures S2 and S4, respectively).

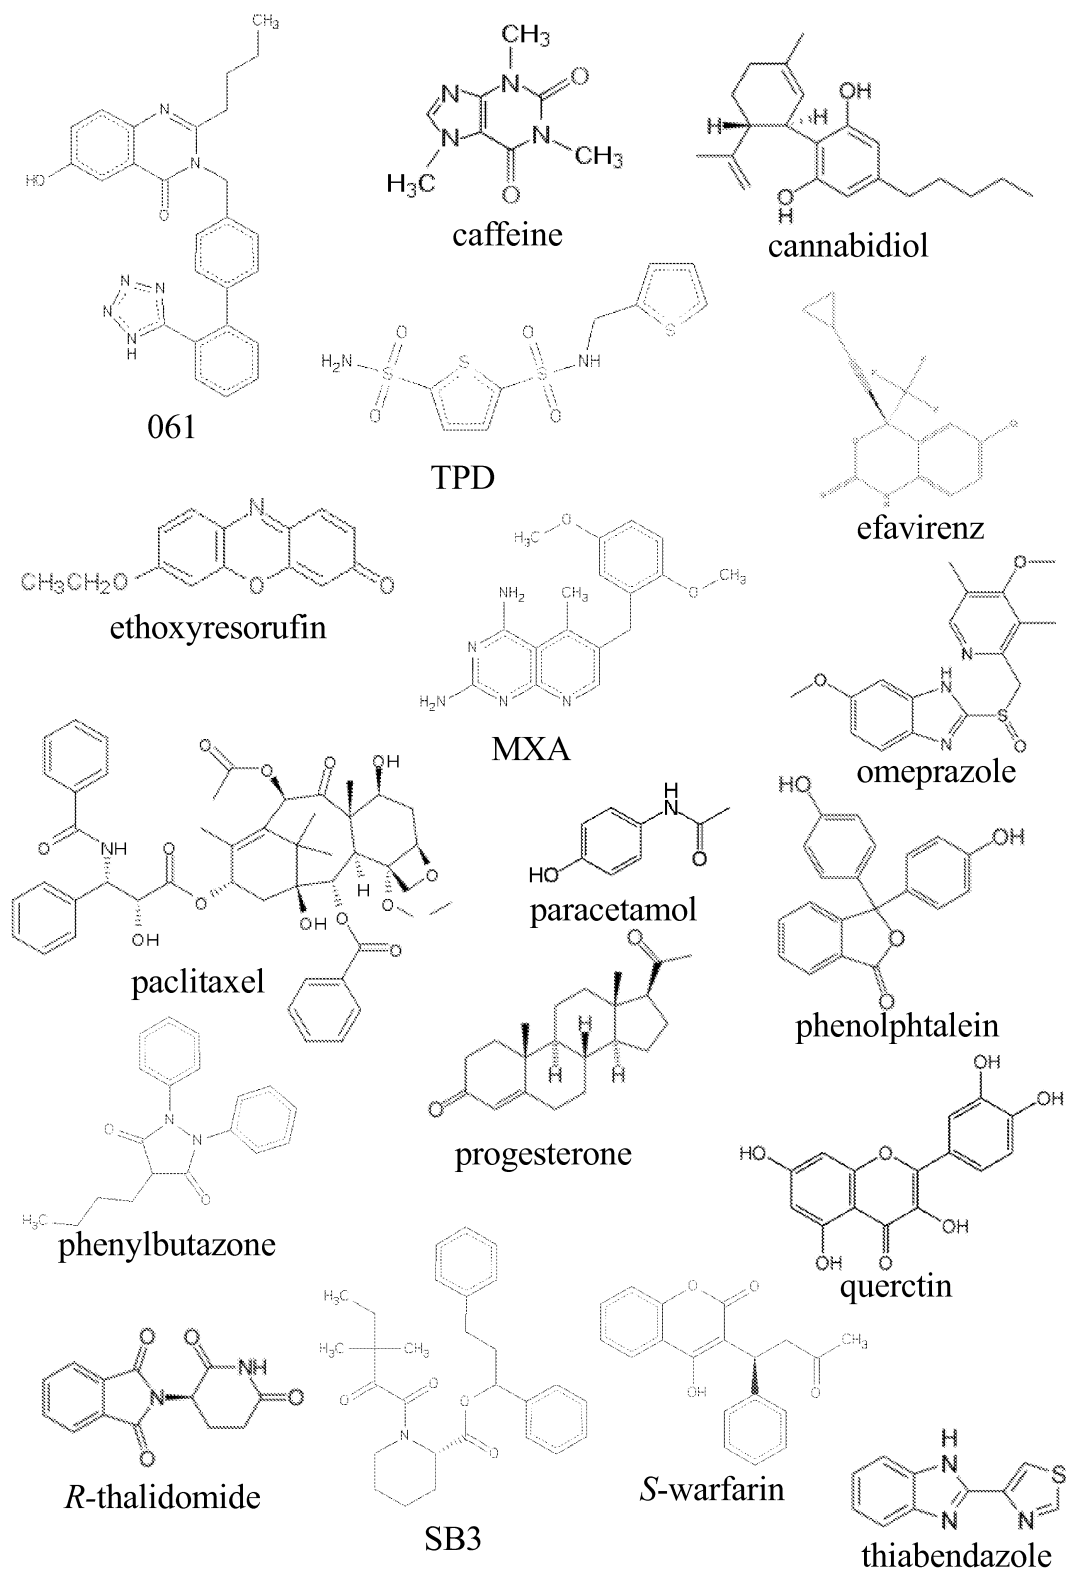



**Figure S2.** Structures of the seven biotin analogues studied: a) biotin (BTN1), b) 2'-iminobiotin (BTN2), c) desthiobiotin (BTN3), d) 1'-N-methoxycarbonylbiotin methyl ester (BTN4), e) *D*-4-*n*-hexyl-2-iminoimidazolidine (BTN5), f) *D*-4-*n*-hexyloxazolidone (BTN6), and g) imidazolidone (BTN7).

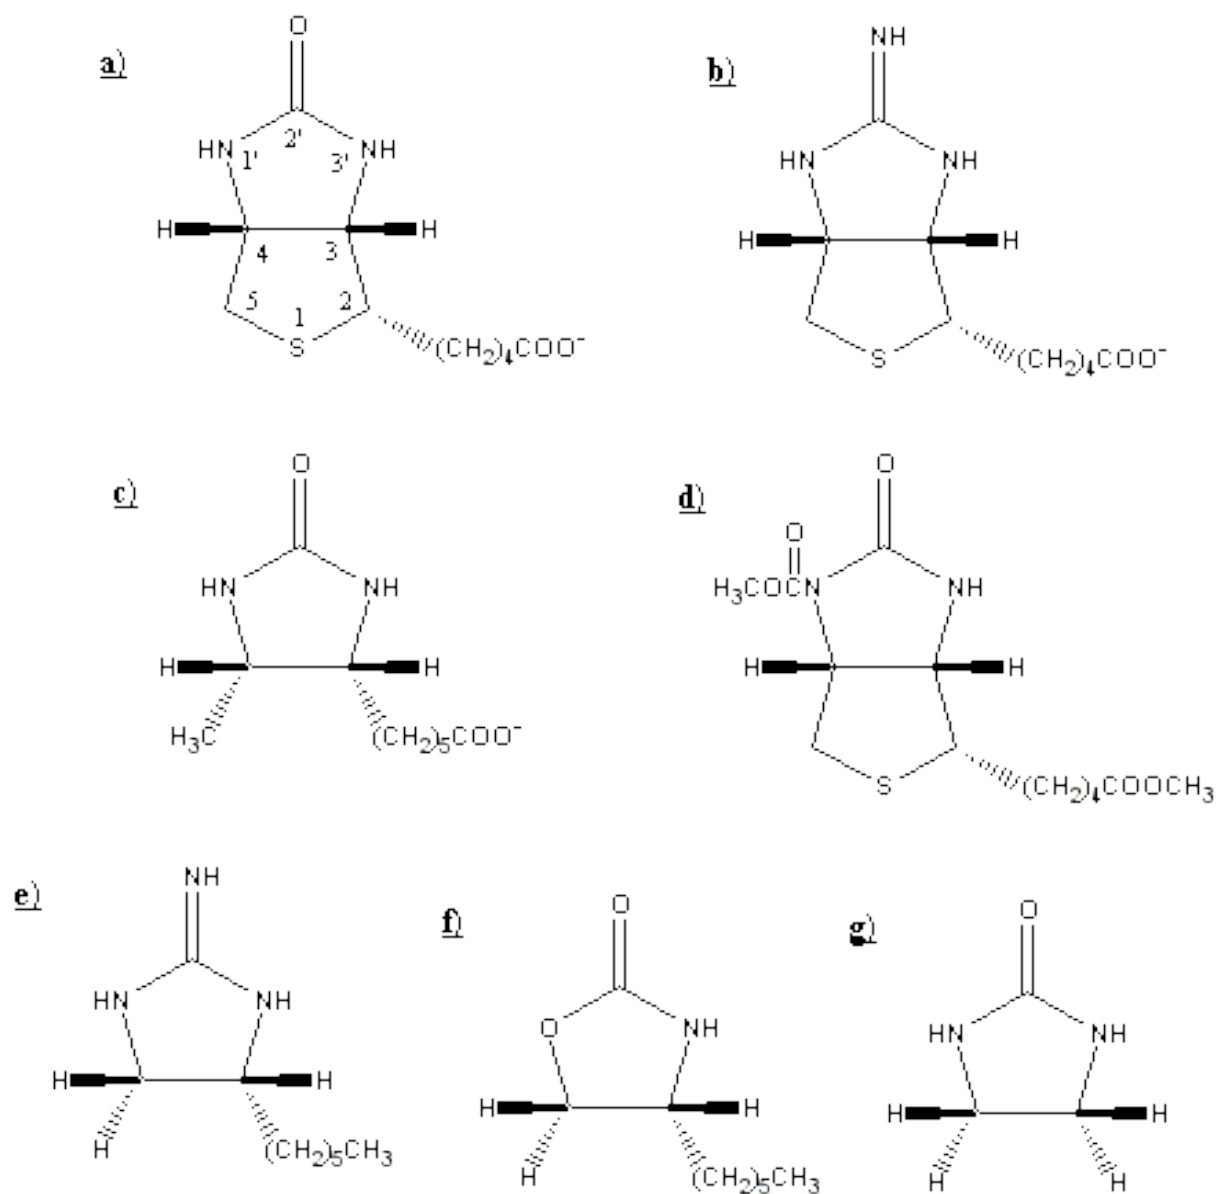

**Figure S3.** Structures of the eleven factor Xa inhibitors studied. FXa39, 57, 63, 103, and 127 (left) have a single positive charge, whereas the other six (right) have a double positive charge.

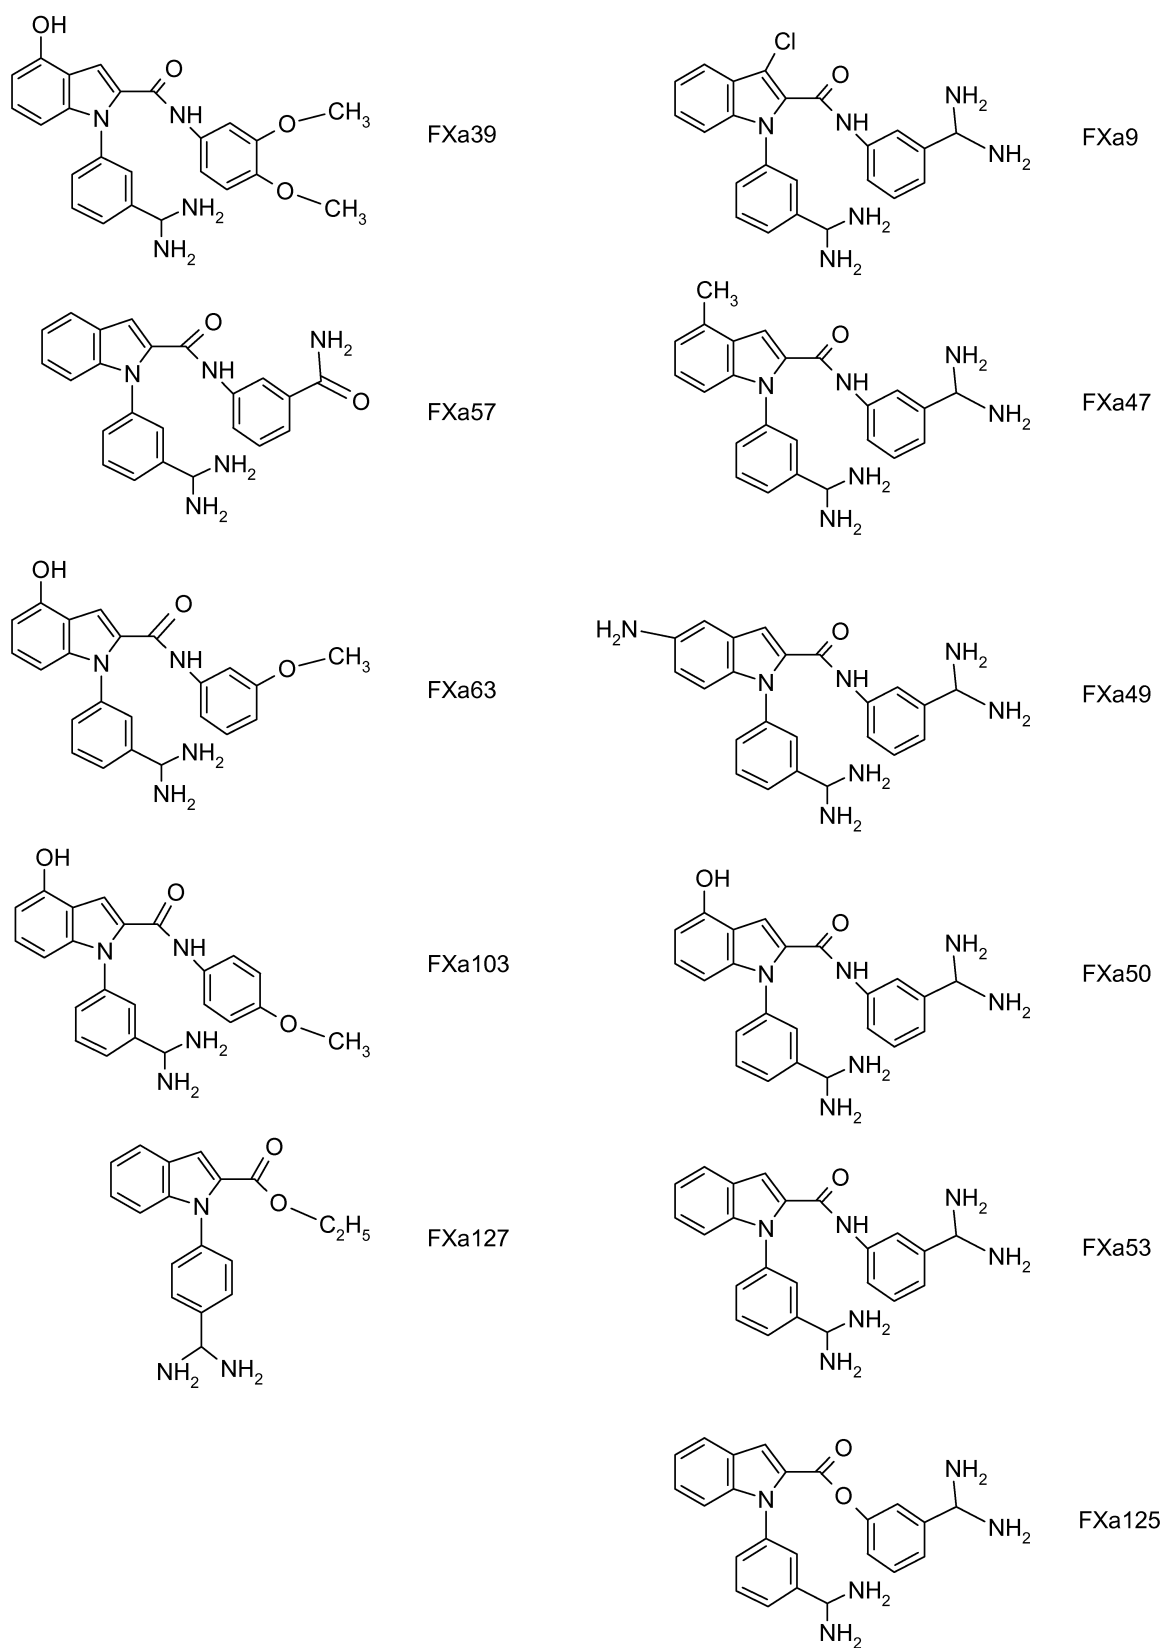

**Figure S4.** Structures of the six galectin-3 inhibitors studied, lactose and Gal2–Gal6.

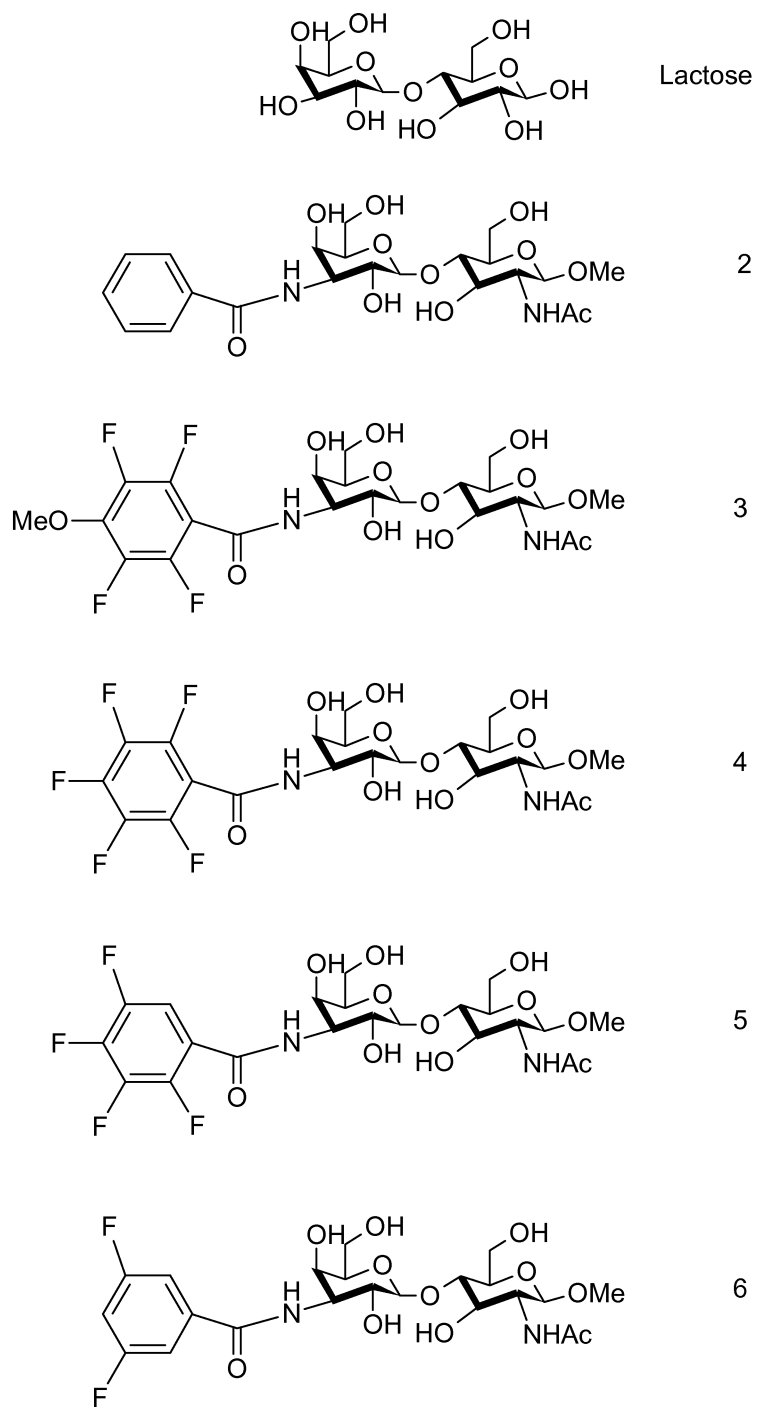

Supplement: 10822_2009_9271_MOESM1_ESM.pdf [file 10822_2009_9271_MOESM1_ESM.pdf]
